# Supplementary material for: Eco-friendly fabrication of coco coir composites for hydroponic cultivation: a green chemistry approach
Source: Royal Society of Chemistry journal article supplement (doi:10.1039/d3nj00226h), 2023-01-01
Supplement: d3nj00226h1.pdf [file d3nj00226h1.pdf]

## Eco-friendly fabrication of coco coir composites for hydroponic cultivation: A green chemistry approach

Avinash Kumar Both, Deepa Choudhry, and Chin Li Cheung\*

Department of Chemistry, University of Nebraska-Lincoln, Lincoln, NE 68588, USA

\*Corresponding Author, E-mail: [ccheung2@unl.edu](mailto:ccheung2@unl.edu)

### Electronic Supporting Information

**Table S1.** Description of reactant quantities used for fabricating coco coir composites of different mass ratios of pectin to coco coir.

| Mass ratio of pectin to coco coir | Mass of 10 wt.% pectin solution (g) | Mass of pectin in the added 10 wt.% pectin solution (g) | Mass of coco coir (g) |
|-----------------------------------|-------------------------------------|---------------------------------------------------------|-----------------------|
| 1:5                               | 8                                   | 0.8                                                     | 4                     |
| 2:5                               | 16                                  | 1.6                                                     | 4                     |
| 3:5                               | 24                                  | 2.4                                                     | 4                     |
| 4:5                               | 32                                  | 3.2                                                     | 4                     |
| 5:5                               | 40                                  | 4                                                       | 4                     |

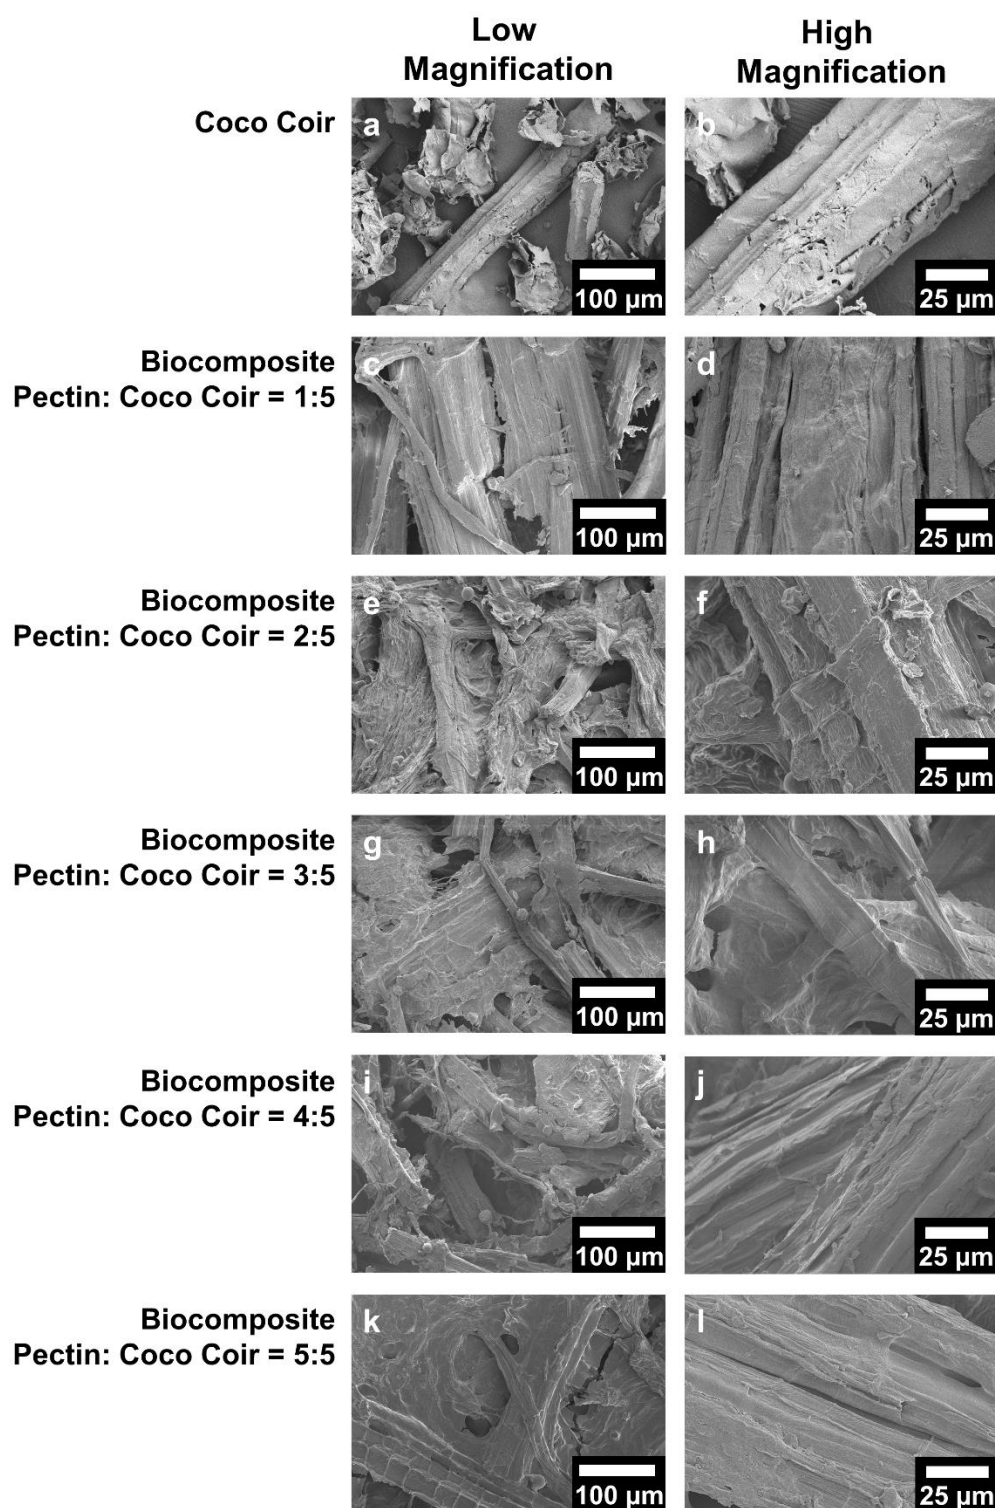

**Figure S1.** SEM micrographs showing microscopic structures of (a-b) coco coir, and biocomposites made using different mass ratios of pectin to coco coir: (c-d) 1:5, (e-f) 2:5, (g-h) 3:5, (i-j) 4:5, and (k-l) 5:5.

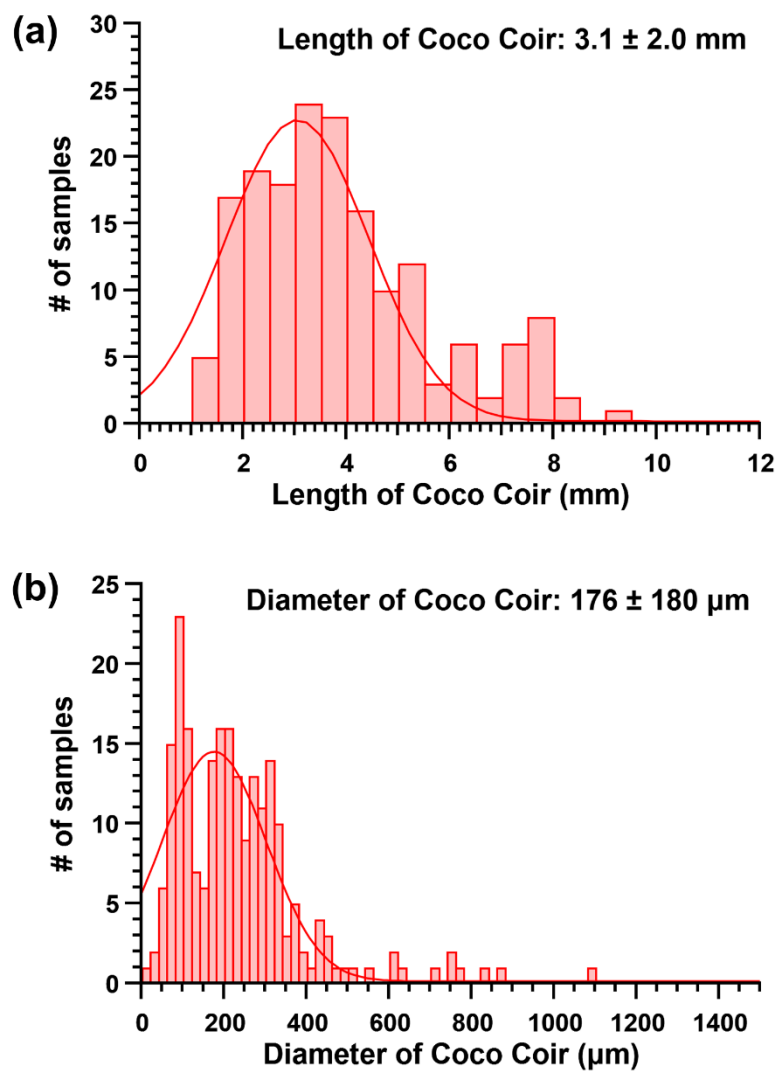

**Figure S2.** Histograms showing the (a) length distribution and (b) diameter distribution of coco coir.

**Table S2.** Bulk density of coco coir composites fabricated using different mass ratios of pectin to coco coir expressed as mean value  $\pm$  one standard deviation (error bar). The superscripted lowercase letters (a - b) assigned to the significantly different mean values ( $P < 0.05$ ) are determined using one-way ANOVA with replication followed by Tukey's HSD (Honest Significant Difference) test.

| Mass ratio of pectin to coco coir | Bulk density (g/cm <sup>3</sup> ) |
|-----------------------------------|-----------------------------------|
| 1:5                               | 0.21 $\pm$ 0.01 <sup>b</sup>      |
| 2:5                               | 0.22 $\pm$ 0.02 <sup>b</sup>      |
| 3:5                               | 0.24 $\pm$ 0.01 <sup>ab</sup>     |
| 4:5                               | 0.26 $\pm$ 0.01 <sup>a</sup>      |
| 5:5                               | 0.27 $\pm$ 0.02 <sup>a</sup>      |

**Table S3.** ANOVA (one-factor) results depicting the main and interaction effects of different mass ratios pectin to coco coir on the bulk density of the as-fabricated coco coir composite.

| ANOVA results for bulk density  |       |    |       |       |                       |        |
|---------------------------------|-------|----|-------|-------|-----------------------|--------|
| Source of variation             | SS    | df | MS    | F     | P-value               | F crit |
| Interaction between mass ratios | 57.13 | 1  | 57.13 | 53.31 | 5.99 $\times 10^{-8}$ | 4.19   |
| Within between mass ratios      | 30.01 | 28 | 1.07  |       |                       |        |
| Total                           | 87.14 | 29 |       |       |                       |        |

**Table S4.** Compressive strength of coco coir composites fabricated using different mass ratios of pectin to coco coir expressed as mean value  $\pm$  one standard deviation (error bar). The superscripted lowercase letters (a-c) assigned to the significantly different mean values ( $P < 0.05$ ) are determined using one-way ANOVA with replication followed by Tukey's HSD (Honest Significant Difference) test.

| Mass ratio of pectin to coco coir | Compressive strength (MPa)    |
|-----------------------------------|-------------------------------|
| 1:5                               | 0.32 $\pm$ 0.11 <sup>c</sup>  |
| 2:5                               | 0.48 $\pm$ 0.10 <sup>c</sup>  |
| 3:5                               | 0.62 $\pm$ 0.12 <sup>bc</sup> |
| 4:5                               | 0.85 $\pm$ 0.11 <sup>ab</sup> |
| 5:5                               | 0.97 $\pm$ 0.11 <sup>a</sup>  |

**Table S5.** ANOVA results depicting the main and interaction effects of different mass ratios of reactants on the mechanical compressive strength of the as-fabricated coco coir composites.

| ANOVA results for mechanical compressive strength |           |           |           |          |                       |               |
|---------------------------------------------------|-----------|-----------|-----------|----------|-----------------------|---------------|
| Source of variation                               | <i>SS</i> | <i>df</i> | <i>MS</i> | <i>F</i> | <i>P-value</i>        | <i>F crit</i> |
| Interaction between mass ratios                   | 41.72     | 1         | 41.72     | 37.68    | $1.26 \times 10^{-6}$ | 4.19          |
| Within between mass ratios                        | 31.01     | 28        | 1.11      |          |                       |               |
|                                                   |           |           |           |          |                       |               |
| Total                                             | 72.72     | 29        |           |          |                       |               |

**Table S6.** Chemical and physical properties of commercial peat moss and the as-fabricated coco coir composite synthesized using a 2:5 mass ratio of pectin to coco coir.

| Material               | Electrical conductivity (mS·cm <sup>-1</sup> ) | pH  | Carbon-to-nitrogen ratio | Bulk density (g/cm <sup>3</sup> ) | Water retention capacity % | Compressive strength (MPa) |
|------------------------|------------------------------------------------|-----|--------------------------|-----------------------------------|----------------------------|----------------------------|
| Coco coir composite    | 1.51                                           | 7.5 | 78.5                     | 0.22                              | 21.6 ± 4.3                 | 0.48                       |
| Peat moss <sup>1</sup> | 0.05                                           | 5.0 | 14.2                     | 0.21 <sup>2</sup>                 | 14.8 ± 2.7                 | N/A                        |

## References

1. A. K. Both, M. A. Helle, G. Madireddy and C. L. Cheung, *ACS Agric. Sci. Technol.*, 2021, **1**, 499-506.
2. D. Stevenson, *Can. J. Soil Sci.*, 1974, **54**, 109-110.
